# Supplementary material
Source: PubMed Central journal article supplement (PMC3950354)
Supplement: NIHMS557962-supplement-Supplemental_material.pdf [file NIHMS557962-supplement-Supplemental_material.pdf]

## **SUPPLEMENTAL MATERIAL**

### **Supplemental Methods**

#### ***Evans blue staining***

Evans blue staining of cardiomyocytes was used as an indicator of necrosis as previously described<sup>1</sup>. 1% Evans blue dye (in PBS) at a volume of 1% of body mass was injected intraperitoneally 24h prior to sacrifice. Cardiac cryosections from CSILK-KO and control mice were then stained with  $\alpha$ -actinin and DAPI.

#### ***MMP activity***

Enzymatic activity of MMP-2 and MMP-9 was determined by gelatin zymography of cardiac tissue homogenate, as described<sup>2</sup>. In brief, 40  $\mu$ g of protein from heart homogenate were electrophoresed through a 10% polyacrylamide gel copolymerized with gelatin (Bio-Rad). The gels were washed with renaturing buffer and incubated for 30 minutes at room temperature, and incubated overnight at 37°C in and developing buffer (Bio-Rad). After incubation, the gels were stained with 0.5% Coomassie Blue R-250 (Bio-Rad) for 30 minutes, then de-stain the gel. Gelatinolytic activities were detected as transparent bands against the dark blue background. Zymograms were digitally scanned, and band intensities were quantified using NIH image J.

**Supplemental Table 1. Primer sequence of QRT-PCR**

| Symbol | Full name                                |         | Sequence                |
|--------|------------------------------------------|---------|-------------------------|
| Acta1  | Actin, alpha 1, skeletal muscle          | Forward | AGTGCGACATCGACATCAGG    |
|        |                                          | Reverse | GGAGCCAGAGCTGTGATCT     |
| Ankrd1 | Ankyrin repeat domain 1 (cardiac muscle) | Forward | ATGCCAAGGACAGAGAAGGA    |
|        |                                          | Reverse | TCTCCTTGAGGCTGTCTCGAAT  |
| Clu    | Clusterin                                | Forward | AGCAGGAGGTCTCTGACAATG   |
|        |                                          | Reverse | GGCTTCCTCTAAACTGTTGAGC  |
| Col1a2 | Col1a2                                   | Forward | CTGGAACAAATGGGCTCACTG   |
|        |                                          | Reverse | CAGGCTCACCAACAAGTCCTC   |
| Ctgf   | Connective tissue growth factor          | Forward | GGGCCTCTTCTGCGATTTTC    |
|        |                                          | Reverse | ATCCAGGCAAGTGCATTGGTA   |
| Cxcl4  | Chemokine (C-X-C motif) ligand 4         | Forward | GTTGTTTCTGCCAGCGGTGGTT  |
|        |                                          | Reverse | TTCACACACACACAGCTAAGA   |
| Igf1   | Igf1                                     | Forward | CTGGACCAGAGACCCCTTTGC   |
|        |                                          | Reverse | GGACGGGGACTTCTGAGTCTT   |
| Mgp    | Matrix Gla protein                       | Forward | GGCAACCCTGTGCTACGAAT    |
|        |                                          | Reverse | CCTGGACTCTCTTTTGGGCTTTA |
| Nppa   | Natriuretic peptide precursor type A     | Forward | GCTTCCAGGCCATATTGGAG    |
|        |                                          | Reverse | GGGGGCATGACCTCATCTT     |
| Nppb   | Natriuretic peptide precursor type B     | Forward | CCCAAAAAGAGTCCTTCGGTC   |
|        |                                          | Reverse | CGGTCTATCTTGTGCCCAAAG   |

---

| Nuclear receptor subfamily 4, group A, |                                         |         |                         |
|----------------------------------------|-----------------------------------------|---------|-------------------------|
| Nr4a1                                  | member 1                                | Forward | CCTCATCACTGATCGACA      |
|                                        |                                         | Reverse | AGCCATGTGCTCCTTCAGACAG  |
| Perp                                   | PERP, TP53 apoptosis effector           | Forward | ATCGCCTTCGACATCATCGC    |
|                                        |                                         | Reverse | CCCCATGCGTACTCCATGAG    |
| Plxdc1                                 | Plxdc1                                  | Forward | AGTTCTCACCGACAGGCTTCAA  |
|                                        |                                         | Reverse | GTTGCTATGGTGATCTGC      |
| Postn                                  | Periostin, osteoblast specific factor   | Forward | CCTGCCCTTATATGCTCTGCT   |
|                                        |                                         | Reverse | AAACATGGTCAATAGGCATCACT |
| Ppara                                  | Ppara                                   | Forward | AGAGCCCCATCTGTCCTCTC    |
|                                        |                                         | Reverse | ACTGGTAGTCTGCAAACCAAA   |
| Ppm1k                                  | Protein phosphatase 1K                  | Forward | CTTTGTCAACCAGTGCCACGAT  |
|                                        |                                         | Reverse | TATTGCCTGCTCAGTCAC      |
| Ptgds                                  | Prostaglandin D2 synthase (brain)       | Forward | GCTCCTGGACACTACACCTAC   |
|                                        |                                         | Reverse | CTTGGTGCCTCTGCTGAATAG   |
| Spp1                                   | Secreted phosphoprotein 1               | Forward | ATCTCACCATTTCGGATGAGTCT |
|                                        |                                         | Reverse | TCAGTCCATAAGCCAAGCTATCA |
| Sqstm1                                 | Sequestosome 1                          | Forward | ATGTGGAACATGGAGGGAAGA   |
|                                        |                                         | Reverse | GGAGTTCACCTGTAGATGGGT   |
| TaoK2                                  | TAO kinase 2                            | Forward | GCATCCTAATACCATTTCAGTAC |
|                                        |                                         | Reverse | AAGCTGAGCCCAGGCAATACTC  |
| Thbs4                                  | Thrombospondin 4                        | Forward | CTGCCACAAGCACAGGAGA     |
|                                        |                                         | Reverse | TGACCTGCTGCCTCAGAAGA    |
| Timp1                                  | Tissue inhibitor of metalloproteinase 1 | Forward | GCAACTCGGACCTGGTCATAA   |
|                                        |                                         | Reverse | CGGCCCGTGATGAGAACT      |

---

---

|       |                                  |         |                         |
|-------|----------------------------------|---------|-------------------------|
| Tnc   | Tenascin C                       | Forward | ACGGCTACCACAGAAGCTG     |
|       |                                  | Reverse | ATGGCTGTTGTTGCTATGGCA   |
| Tnf   | Tumor necrosis factor            | Forward | CCCTCACACTCAGATCATCTTCT |
|       |                                  | Reverse | GCTACGACGTGGGCTACAG     |
|       | WNT1 inducible signaling pathway |         |                         |
| Wisp1 | protein 1                        | Forward | CAGCACCACTAGAGGAAACGA   |
|       |                                  | Reverse | CTGGGCACATATCTTACAGCATT |
|       | Glyceraldehyde 3-phosphate       |         |                         |
| GAPDH | dehydrogenase                    | Forward | TGGTGAAGCAGGCATCTGAG    |
|       |                                  | Reverse | TGCTGTTGAAGTCGCAGGAG    |

---

Supplemental Figure 1

Day 21 WT

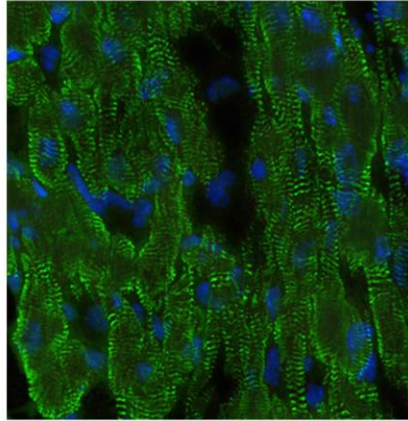

Day 21 ILK-KO

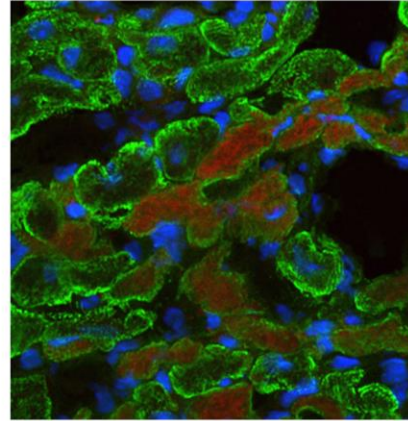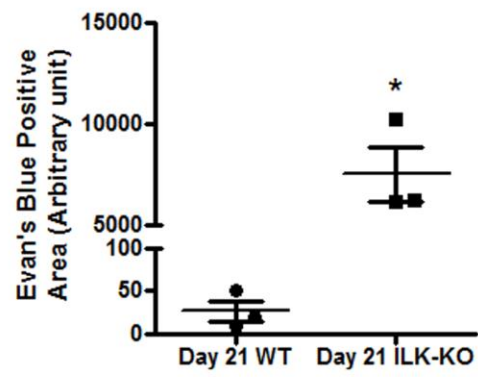

Supplemental Figure 2

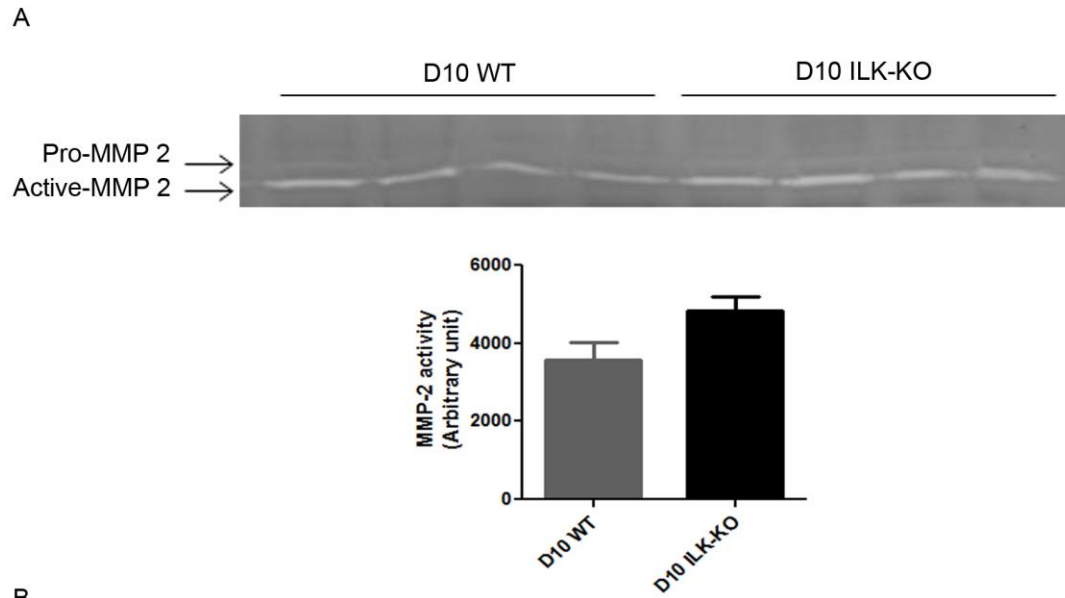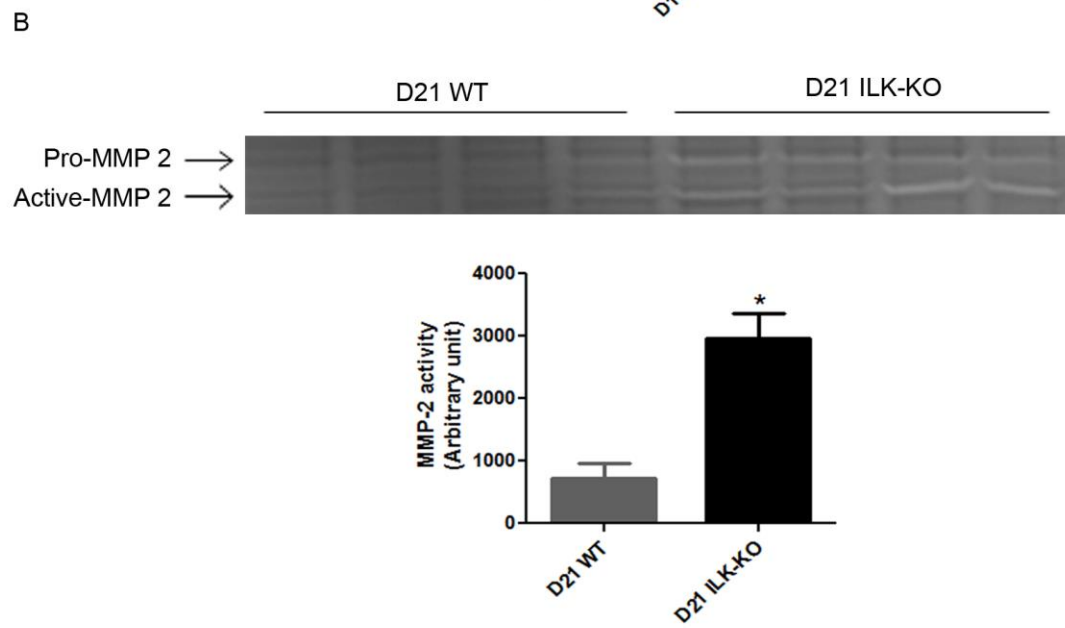

## Supplemental Figure Legends

**Supplemental Figure 1. Increased necrosis in CSILK-KO hearts.** Co-localization of Evans blue (red auto-fluorescence) and  $\alpha$ -actinin staining (green) in cardiomyocytes of 21 day old CSILK-KO 24 h after i.p. injection of 1% Evans blue indicates an increase in cardiomyocyte necrosis. Representative results from three independent experiments are shown in upper panel with corresponding quantitation shown in the lower panel ( $*p < 0.05$  vs. littermate controls).

**Supplemental Figure 2. Increased MMP activity in CSILK-KO hearts.** Gelatin zymography showed increased pro-MMP2 and active MMP2 levels in hearts of 10 (A) and 21 day old (B) CSILK-KO mice compared with littermate controls. Quantitation shown on the lower panel,  $*p < 0.05$  vs. WT, n=6.

## References

1. Miller DL, Li P, Dou C, Armstrong WF, Gordon D. Evans blue staining of cardiomyocytes induced by myocardial contrast echocardiography in rats: evidence for necrosis instead of apoptosis. *Ultrasound Med Biol.* 2007;33:1988-1996.
2. Hu X, Beeton C. Detection of functional matrix metalloproteinases by zymography. *J Vis Exp.* 2010;45:2445.
